# Supplementary material
Source: Springer Nature journal article supplement (https://www.springermedizin.de/resource/supplementary/12936_2012_2698_MOESM1_ESM.pdf/9544088)

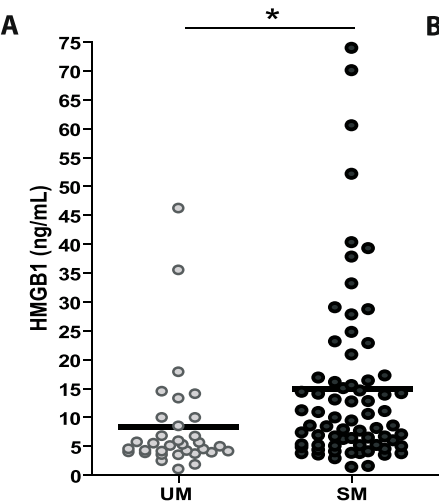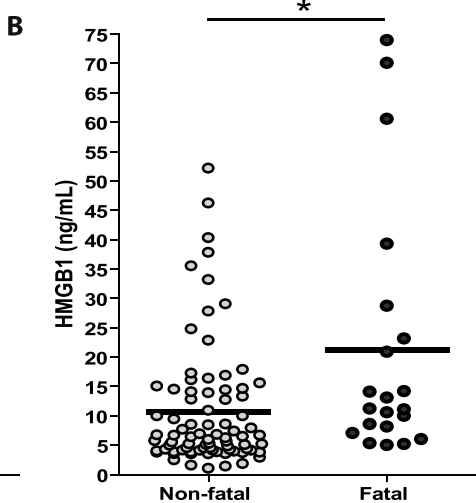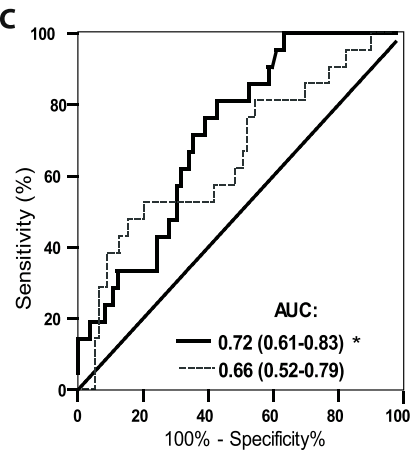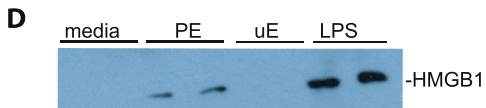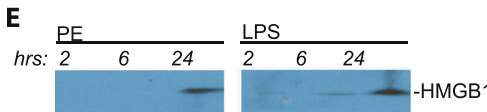

Supplement: MOESM1 [file 9544088]
